# Supplementary material for: Deficiency of Auxin Efflux Carrier OsPIN1b Impairs Chilling and Drought Tolerance in Rice
Source: MDPI journal article supplement (doi:10.3390/plants12234058), 2023-12-02
Supplement: s1 [file s1]

**Table S2.** Gene names and ID numbers used for qRT-PCR in this study.

| Gene name       | Gene ID      |
|-----------------|--------------|
| <i>OsPIN1a</i>  | Os06g0232300 |
| <i>OsPIN1b</i>  | Os02g0743400 |
| <i>OsPIN5a</i>  | Os01g0919800 |
| <i>OsPIN5b</i>  | Os08g0529000 |
| <i>OsPIN9</i>   | Os01g0802700 |
| <i>OsPIN10a</i> | Os01g0643300 |
| <i>OsYUC1</i>   | Os01g0645400 |
| <i>OsYUC3</i>   | Os01g0732700 |
| <i>OsYUC4</i>   | Os01g0224700 |
| <i>OsYUC5</i>   | Os12g0512000 |
| <i>OsYUC7</i>   | Os04g0128900 |
| <i>OsYUC8</i>   | Os03g0162000 |
| <i>OsDREB1A</i> | Os09g0522200 |
| <i>OsDREB1B</i> | Os09g0522000 |
| <i>OsPP2C27</i> | Os02g0799000 |
| <i>OsTPP1</i>   | Os02g0661100 |
| <i>OsNCED1</i>  | Os02g0704000 |
| <i>OsNCED2</i>  | Os12g0435200 |
| <i>OsNCED3</i>  | Os03g0645900 |
| <i>OsNCED4</i>  | Os07g0154100 |
| <i>OsNCED5</i>  | Os12g0617400 |
| <i>OsPYL1</i>   | Os01g0827800 |
| <i>OsPYL3</i>   | Os02g0255500 |
| <i>OsPYL5</i>   | Os05g0213500 |
| <i>OsPYL6</i>   | Os05g0473000 |
| <i>OsACTIN1</i> | Os03g0718100 |
