# Supplementary material for: Deficiency of Auxin Efflux Carrier OsPIN1b Impairs Chilling and Drought Tolerance in Rice
Source: MDPI journal article supplement (doi:10.3390/plants12234058), 2023-12-02

**Figure S2.** Relative shoot height and relative root length analysis upon PEG6000 treatment. Data were calculated using PEG6000 untreated as a control. Data are means  $\pm$  SD. Statistically great significant differences ( $p < 0.001$ ) are indicated by three asterisks (\*\*).

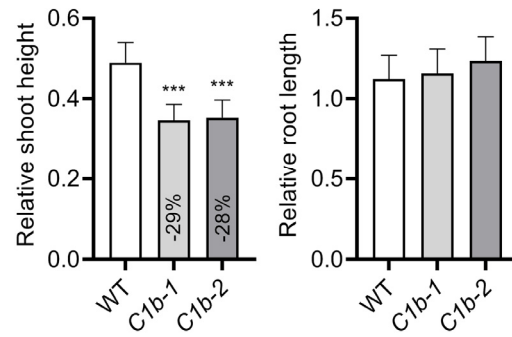

Supplement: s1 [file s1]
