# Supplementary material for: Deficiency of Auxin Efflux Carrier OsPIN1b Impairs Chilling and Drought Tolerance in Rice
Source: MDPI journal article supplement (doi:10.3390/plants12234058), 2023-12-02

**Figure S1.** The responses of wild-type and *ospin1b* mutants to PEG6000 treatment. Phenotype, shoot height and root length under normal (A) and drought (B) conditions. Data are means  $\pm$  SD. Statistically great significant differences ( $p < 0.001$ ) are indicated by three asterisks (\*\*\*)

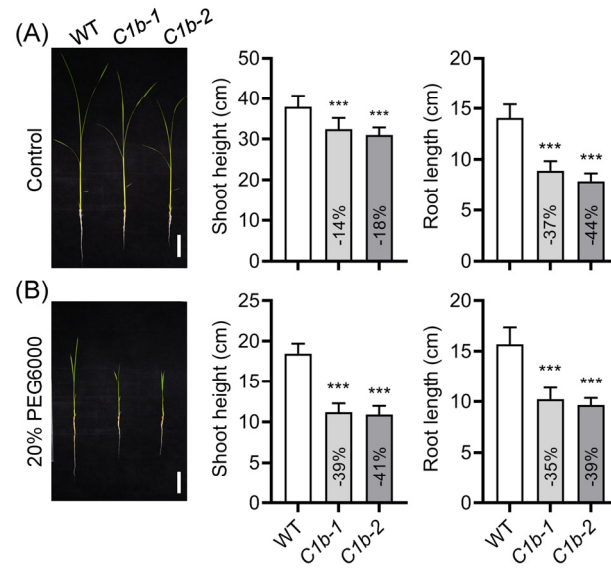

Supplement: s1 [file s1]
