# Supplementary material for: Deficiency of Auxin Efflux Carrier OsPIN1b Impairs Chilling and Drought Tolerance in Rice
Source: MDPI journal article supplement (doi:10.3390/plants12234058), 2023-12-02
Supplement: s1 [file s1]

**Table S1.** Primers used in this study.

| Primers for qRT-PCR | Primer sequences (5'-3')  |
|---------------------|---------------------------|
| OsPIN1a-qF          | CCTGAAATCCATCTCCATCCTC    |
| OsPIN1a-qR          | AACGTCGCCACCTTGTT         |
| OsPIN1b-qF          | GAATCGTGCCCTTTGTGTTTG     |
| OsPIN1b-qR          | TGTAGTAGACGAGGGTGATAGG    |
| OsPIN5a-qF          | CCCTACCTCAATCCATCACATC    |
| OsPIN5a-qR          | GTAGGGAGACAAGCATTCCAA     |
| OsPIN5b-qF          | GCAAAGGAGTATGGGCTTCA      |
| OsPIN5b-qR          | GCAATCAGAATCGGCAGAGA      |
| OsPIN9-qF           | GAGGACTCTCTGTTCACCATTC    |
| OsPIN9-qR           | GAGAACGACGCTATCTTGTATCC   |
| OsPIN10a-qF         | GTCGAGAAGTCCATCTCCATTC    |
| OsPIN10a-qR         | TTGCCACACGCGATGAT         |
| OsYUC1-qF           | AGGTGTTGGTCGTGGGATGCG     |
| OsYUC1-qR           | GCGATGCCGAACGTGGATAGA     |
| OsYUC3-qF           | GGAAGCGTGTTCTCGTTGTTG     |
| OsYUC3-qR           | ACATTGACAGCCCAAAGGTGG     |
| OsYUC4-qF           | CCTCGACCTCTGCAACCACAATG   |
| OsYUC4-qR           | CGACAACAGGAGTACCAGCCAATC  |
| OsYUC5-qF           | GTCAGCCTCGACCTCTGCAACA    |
| OsYUC5-qR           | TGGGAAACCACTTGAGAAGGAACAC |
| OsYUC7-qF           | ACCGGCTACCGCAGCAATGTG     |
| OsYUC7-qR           | CGTACAGCCCCGACTCACCCCT    |
| OsYUC8-qF           | GAGATGTGCCTGGACCTCTGC     |
| OsYUC8-qR           | GTGTCTCCCAGCACCATCCTT     |
| OsDREB1A-qF         | AGCGACCTGGCGTTTCG         |
| OsDREB1A-qR         | TCGCGTAGTACAGGTCCCA       |
| OsDREB1B-qF         | GAGACCTTCGCCAACGATG       |
| OsDREB1B-qR         | CACCGGCAACACGTCCTT        |
| OsPP2C27-qF         | CACTTGGCGGCTATGTT         |
| Os PP2C27-qR        | CCTGGCTCACCCACTTC         |
| OsTPP1-qF           | TGTCTCCCGTGATGAGAGCTG     |
| OsTPP1-qR           | AAACACCTTATTGCGGGACCTT    |
| OsNCED1-qF          | CTCACCATGAAGTCCATGAGGCTT  |
| OsNCED1-qR          | GTTCTCGTAGTCTTGGTCTTGGCT  |
| OsNCED2-qF          | GGTATGGAAACGAGGATAGTGGTT  |
| OsNCED2-qR          | TGCTTATTGTTGTGCGAGAAGTTC  |
| OsNCED3-qF          | CCCCTCCCAAACCATCCAAACCGA  |
| OsNCED3-qR          | TGTGAGCATATCCTGGCGTCGTGA  |
| OsNCED4-qF          | TCCATCTCCTTCTCCCTCCTCCCA  |
| OsNCED4-qR          | CCTCGCACCCCTGCTTGATCTTGCC |

|             |                           |
|-------------|---------------------------|
| OsNCED5-qF  | ACATCCGAGCTCCTCGTCGTGAA   |
| OsNCED5-qR  | TTGGAAGGTGTTTTGGAATGAACCA |
| OsPYL1-qF   | CAGAGGAAAAAGAAGGCAACGAC   |
| OsPYL1-qR   | GCACCACGGTGGAGAAGCA       |
| OsPYL3-qF   | AAGGGAACATTGAGATTGGC      |
| OsPYL3-qR   | CGGTCAGGATGGAGGAGTAA      |
| OsPYL5-qF   | CATCCTCAGCGTCAAGTTCG      |
| OsPYL5-qR   | TCACAAGCGTCCCTGGTCT       |
| OsPYL6-qF   | ATGATGCCGTACACCGCTCC      |
| OsPYL6-qR   | CGCCGCCTTCAACACTCC        |
| OsACTIN1-qF | CTTCATAGGAATGGAAGCTGCG    |
| OsACTIN1-qR | CACCTTGATCTTCATGCTGCTA    |
